# Supplementary material for: COVID-19 related disruption and resilience in immunisation activities in LMICs: a rapid review
Source: HighWire-hosted journal article supplement (doi:10.1136/bmjopen-2023-076607), 2024-08-01
Supplement: bmjopen-2023-076607supp001_data_supplement.pdf [file bmjopen-2023-076607supp001_data_supplement.pdf]

## Supplementary Index: COVID-19-related disruption and resiliency in immunisation activities in LMICs: a rapid review

Anna-Maria Hartner, Xiang Li, Katy Gaythorpe

July 15, 2024

### Search Strategy

We searched PubMed and Web of science on 6th October 2023 for studies published after 1st December 2019 in English. Our full list of search terms was as follows: (((COVID-19) OR (SARS-CoV-2))) AND (immunisation OR vaccination) AND (disruption OR delay\* OR postpon\*).

### PRISMA Checklist

The PRISMA checklist is referenced in the main text on page 3.

| Section and Topic       | Item | Checklist item                                                                                                                                                                                                                                                                                       | Location where item is reported                                               |
|-------------------------|------|------------------------------------------------------------------------------------------------------------------------------------------------------------------------------------------------------------------------------------------------------------------------------------------------------|-------------------------------------------------------------------------------|
| TITLE                   |      |                                                                                                                                                                                                                                                                                                      |                                                                               |
| Title                   | 1    | Identify the report as a systematic review.                                                                                                                                                                                                                                                          | Title identifies study as a rapid review (page 1).                            |
| ABSTRACT                |      |                                                                                                                                                                                                                                                                                                      |                                                                               |
| Abstract                | 2    | See the PRISMA 2020 for Abstracts checklist.                                                                                                                                                                                                                                                         | Abstract follows BMJ Open guidelines (pages 1-2).                             |
| INTRODUCTION            |      |                                                                                                                                                                                                                                                                                                      |                                                                               |
| Rationale               | 3    | Describe the rationale for the review in the context of existing knowledge.                                                                                                                                                                                                                          | Introduction (pages 2-3).                                                     |
| Objectives              | 4    | Provide an explicit statement of the objective(s) or question(s) the review addresses.                                                                                                                                                                                                               | Aim and research questions (page 3).                                          |
| METHODS                 |      |                                                                                                                                                                                                                                                                                                      |                                                                               |
| Eligibility criteria    | 5    | Specify the inclusion and exclusion criteria for the review and how studies were grouped for the syntheses.                                                                                                                                                                                          | Methods: procedure (page 3).                                                  |
| Information sources     | 6    | Specify all databases, registers, websites, organisations, reference lists and other sources searched or consulted to identify studies. Specify the date when each source was last searched or consulted.                                                                                            | Methods: procedure (page 3).                                                  |
| Search strategy         | 7    | Present the full search strategies for all databases, registers and websites, including any filters and limits used.                                                                                                                                                                                 | Methods: procedure (page 3) and supplementary index (page 1).                 |
| Selection process       | 8    | Specify the methods used to decide whether a study met the inclusion criteria of the review, including how many reviewers screened each record and each report retrieved, whether they worked independently, and if applicable, details of automation tools used in the process.                     | Methods: Study selection, data extraction and quality assessment (pages 3-4). |
| Data collection process | 9    | Specify the methods used to collect data from reports, including how many reviewers collected data from each report, whether they worked independently, any processes for obtaining or confirming data from study investigators, and if applicable, details of automation tools used in the process. | Methods: Study selection, data extraction and quality assessment (pages 3-4). |

| Section and Topic             | Item | Checklist item                                                                                                                                                                                                                                                                | Location where item is reported                                               |
|-------------------------------|------|-------------------------------------------------------------------------------------------------------------------------------------------------------------------------------------------------------------------------------------------------------------------------------|-------------------------------------------------------------------------------|
| Data items                    | 10a  | List and define all outcomes for which data were sought. Specify whether all results that were compatible with each outcome domain in each study were sought (e.g. for all measures, time points, analyses), and if not, the methods used to decide which results to collect. | Methods: Study selection, data extraction and quality assessment (pages 3-4). |
|                               | 10b  | List and define all other variables for which data were sought (e.g. participant and intervention characteristics, funding sources). Describe any assumptions made about any missing or unclear information.                                                                  | Methods: Study selection, data extraction and quality assessment (pages 3-4). |
| Study risk of bias assessment | 11   | Specify the methods used to assess risk of bias in the included studies, including details of the tool(s) used, how many reviewers assessed each study and whether they worked independently, and if applicable, details of automation tools used in the process.             | Methods: Study selection, data extraction and quality assessment (pages 3-4). |
| Effect measures               | 12   | Specify for each outcome the effect measure(s) (e.g. risk ratio, mean difference) used in the synthesis or presentation of results.                                                                                                                                           | N/A; narrative synthesis only.                                                |
| ω                             | 13a  | Describe the processes used to decide which studies were eligible for each synthesis (e.g. tabulating the study intervention characteristics and comparing against the planned groups for each synthesis (item 5)).                                                           | All studies meeting inclusion criteria were synthesized.                      |
|                               | 13b  | Describe any methods required to prepare the data for presentation or synthesis, such as handling of missing summary statistics, or data conversions.                                                                                                                         | N/A; narrative synthesis only.                                                |
|                               | 13c  | Describe any methods used to tabulate or visually display results of individual studies and syntheses.                                                                                                                                                                        | N/A                                                                           |
|                               | 13d  | Describe any methods used to synthesize results and provide a rationale for the choice(s). If meta-analysis was performed, describe the model(s), method(s) to identify the presence and extent of statistical heterogeneity, and software package(s) used.                   | Methods: Synthesis (page 4).                                                  |
|                               | 13e  | Describe any methods used to explore possible causes of heterogeneity among study results (e.g. subgroup analysis, meta-regression).                                                                                                                                          | N/A; narrative synthesis only.                                                |
|                               | 13f  | Describe any sensitivity analyses conducted to assess robustness of the synthesized results.                                                                                                                                                                                  | N/A; narrative synthesis only.                                                |
| Reporting bias assessment     | 14   | Describe any methods used to assess risk of bias due to missing results in a synthesis (arising from reporting biases).                                                                                                                                                       | N/A; limitations in discussion (pages 9-10).                                  |
| Certainty assessment          | 15   | Describe any methods used to assess certainty (or confidence) in the body of evidence for an outcome.                                                                                                                                                                         | N/A; narrative synthesis only.                                                |

| Section and Topic             | Item | Checklist item                                                                                                                                                                                                                                                                       | Location where item is reported                                                 |
|-------------------------------|------|--------------------------------------------------------------------------------------------------------------------------------------------------------------------------------------------------------------------------------------------------------------------------------------|---------------------------------------------------------------------------------|
| RESULTS                       |      |                                                                                                                                                                                                                                                                                      |                                                                                 |
| Study selection               | 16a  | Describe the results of the search and selection process, from the number of records identified in the search to the number of studies included in the review, ideally using a flow diagram.                                                                                         | Results: Characteristics of studies (page 4).                                   |
|                               | 16b  | Cite studies that might appear to meet the inclusion criteria, but which were excluded, and explain why they were excluded.                                                                                                                                                          | Results: Characteristics of studies (page 4).                                   |
| Study characteristics         | 17   | Cite each included study and present its characteristics.                                                                                                                                                                                                                            | Results: Characteristics of studies (page 4); all studies are cited throughout. |
| Risk of bias in studies       | 18   | Present assessments of risk of bias for each included study.                                                                                                                                                                                                                         | Supplementary Index: pages 9-10                                                 |
| Results of individual studies | 19   | For all outcomes, present, for each study: (a) summary statistics for each group (where appropriate) and (b) an effect estimate and its precision (e.g. confidence/credible interval), ideally using structured tables or plots.                                                     | N/A; narrative synthesis only                                                   |
|                               | 20a  | For each synthesis, briefly summarise the characteristics and risk of bias among contributing studies.                                                                                                                                                                               | Results; bias in discussion (pages 4-10).                                       |
| Results of syntheses          | 20b  | Present results of all statistical syntheses conducted. If meta-analysis was done, present for each the summary estimate and its precision (e.g. confidence/credible interval) and measures of statistical heterogeneity. If comparing groups, describe the direction of the effect. | N/A; narrative synthesis only.                                                  |
|                               | 20c  | Present results of all investigations of possible causes of heterogeneity among study results.                                                                                                                                                                                       | N/A; narrative synthesis only.                                                  |
|                               | 20d  | Present results of all sensitivity analyses conducted to assess the robustness of the synthesized results.                                                                                                                                                                           | N/A; narrative synthesis only.                                                  |
| Reporting biases              | 21   | Present assessments of risk of bias due to missing results (arising from reporting biases) for each synthesis assessed.                                                                                                                                                              | Discussion (pages 9-10).                                                        |
| Certainty of evidence         | 22   | Present assessments of certainty (or confidence) in the body of evidence for each outcome assessed.                                                                                                                                                                                  | Discussion (pages 9-10)                                                         |
| DISCUSSION                    |      |                                                                                                                                                                                                                                                                                      |                                                                                 |
|                               | 23a  | Provide a general interpretation of the results in the context of other evidence.                                                                                                                                                                                                    | Discussion (pages 9-10)                                                         |
|                               | 23b  | Discuss any limitations of the evidence included in the review.                                                                                                                                                                                                                      | Discussion (pages 9-10)                                                         |
|                               | 23c  | Discuss any limitations of the review processes used.                                                                                                                                                                                                                                | Discussion (pages 9-10)                                                         |

| Section and Topic                              | Item | Checklist item                                                                                                                                                                                                                             | Location where item is reported                                                     |
|------------------------------------------------|------|--------------------------------------------------------------------------------------------------------------------------------------------------------------------------------------------------------------------------------------------|-------------------------------------------------------------------------------------|
| Discussion                                     | 23d  | Discuss implications of the results for practice, policy, and future research.                                                                                                                                                             | Discussion (pages 9-10)                                                             |
| OTHER INFORMATION                              |      |                                                                                                                                                                                                                                            |                                                                                     |
| Registration and protocol                      | 24a  | Provide registration information for the review, including register name and registration number, or state that the review was not registered.                                                                                             | Review was not registered.                                                          |
|                                                | 24b  | Indicate where the review protocol can be accessed, or state that a protocol was not prepared.                                                                                                                                             | Protocol was not prepared.                                                          |
|                                                | 24c  | Describe and explain any amendments to information provided at registration or in the protocol.                                                                                                                                            | N/A                                                                                 |
| Support                                        | 25   | Describe sources of financial or non-financial support for the review, and the role of the funders or sponsors in the review.                                                                                                              | Acknowledgments                                                                     |
| Competing interests                            | 26   | Declare any competing interests of review authors.                                                                                                                                                                                         | Acknowledgments                                                                     |
| Availability of data, code and other materials | 27   | Report which of the following are publicly available and where they can be found: template data collection forms; data extracted from included studies; data used for all analyses; analytic code; any other materials used in the review. | Articles used in narrative synthesis are publicly available and given in citations. |

5

Table 1: Preferred Reporting Items for Systematic reviews and Meta-Analyses (PRISMA) Checklist

## **Critical Appraisal Skills Program Quality Assessment**

| Study                          | Aims stated? | Appropriate methods? | Appropriate methods for aims? | Appropriate recruitment strategy for aims? | Data collected in way that addressed research question? | Relationship between researcher and participants? | Ethical consideration? | Rigorous Data Analysis? | Clear findings? |
|--------------------------------|--------------|----------------------|-------------------------------|--------------------------------------------|---------------------------------------------------------|---------------------------------------------------|------------------------|-------------------------|-----------------|
| Hou et. al., 2021              | Yes          | Yes                  | Yes                           | Yes                                        | Yes                                                     | Primary Data                                      | Yes                    | Yes                     | Yes             |
| Bose et al., 2022              | Yes          | Yes                  | Yes                           | N/A                                        | Yes                                                     | Secondary Data                                    | Yes                    | Yes                     | Yes             |
| Mansour et al., 2021           | Yes          | Yes                  | Yes                           | Yes                                        | Yes                                                     | Primary and Secondary Data                        | Yes                    | No                      | Yes             |
| Wanyana et. al., 2021          | Yes          | Yes                  | Yes                           | N/A                                        | Yes                                                     | Secondary Data                                    | Yes                    | No                      | Yes             |
| Saso et. al., 2020             | Yes          | Yes                  | Yes                           | Yes                                        | Yes                                                     | Primary Data                                      | Yes                    | Yes                     | Yes             |
| Carter et. al., 2022           | Yes          | Yes                  | Yes                           | Yes                                        | Yes                                                     | Primary Data                                      | Yes                    | Yes                     | Yes             |
| Shapiro et. al., 2022          | Yes          | Yes                  | Yes                           | Yes                                        | Yes                                                     | Primary and Secondary Data                        | Yes                    | Yes                     | Yes             |
| Desta et. al., 2021            | Yes          | Yes                  | Yes                           | Yes                                        | Yes                                                     | Secondary Data                                    | No                     | Yes                     | Yes             |
| Jensen et. al., 2020           | Yes          | Yes                  | Yes                           | Yes                                        | Yes                                                     | Secondary Data                                    | Yes                    | Yes                     | Yes             |
| Silveira et. al., 2021         | Yes          | Yes                  | Yes                           | Yes                                        | Yes                                                     | Secondary Data                                    | Yes                    | No                      | Yes             |
| Harris et. al., 2021           | Yes          | Yes                  | No                            | No                                         | Yes                                                     | Primary Data                                      | Yes                    | Yes                     | Yes             |
| Chandir et. al., 2020          | Yes          | Yes                  | Yes                           | Yes                                        | Yes                                                     | Secondary Data                                    | Yes                    | Yes                     | Yes             |
| Shapira et. al., 2021          | Yes          | Yes                  | Yes                           | N/A                                        | Yes                                                     | Secondary Data                                    | Yes                    | Yes                     | Yes             |
| Abid et. al., 2022             | Yes          | Yes                  | Yes                           | N/A                                        | Yes                                                     | Secondary Data                                    | Yes                    | No                      | Yes             |
| Khan et. al., 2021             | Yes          | Yes                  | Yes                           | N/A                                        | Yes                                                     | Secondary Data                                    | No                     | Yes                     | Yes             |
| Zeitouny et. al., 2021         | Yes          | Yes                  | Yes                           | N/A                                        | Yes                                                     | Secondary Data                                    | Yes                    | Yes                     | Yes             |
| Cabral et. al., 2021           | Yes          | Yes                  | No                            | N/A                                        | Yes                                                     | Secondary Data                                    | Yes                    | Yes                     | Yes             |
| Singh et. al., 2021            | Yes          | Yes                  | Yes                           | Yes                                        | Yes                                                     | Primary Data                                      | Yes                    | Yes                     | Yes             |
| Patel et. al., 2022            | Yes          | Yes                  | Yes                           | Yes                                        | Yes                                                     | Primary Data                                      | Yes                    | Yes                     | Yes             |
| Bekele et. al., 2022           | Yes          | Yes                  | Yes                           | Yes                                        | Yes                                                     | Primary and Secondary Data                        | Yes                    | Yes                     | Yes             |
| Shet et. al., 2021             | Yes          | Yes                  | Yes                           | Yes                                        | Yes                                                     | Primary Data                                      | Yes                    | No                      | Yes             |
| Nguyenet. al., 2021            | Yes          | Yes                  | Yes                           | Yes                                        | Yes                                                     | Primary and Secondary Data                        | Yes                    | Yes                     | Yes             |
| Mishra et. al., 2023           | Yes          | Yes                  | Yes                           | Yes                                        | Yes                                                     | Primary Data                                      | Yes                    | No                      | Yes             |
| Wang et. al., 2022             | Yes          | Yes                  | Yes                           | Yes                                        | Yes                                                     | Primary Data                                      | Yes                    | Yes                     | Yes             |
| Jain et. al., 2021             | Yes          | Yes                  | Yes                           | Yes                                        | Yes                                                     | Secondary Data                                    | Yes                    | Yes                     | Yes             |
| Avula et. al., 2022            | Yes          | Yes                  | Yes                           | Yes                                        | Yes                                                     | Primary and Secondary Data                        | Yes                    | No                      | Yes             |
| Nigus et. al., 2020            | No           | N/A                  | N/A                           | N/A                                        | N/A                                                     | Secondary Data                                    | No                     | No                      | Yes             |
| Assefa et. al., 2021           | Yes          | Yes                  | Yes                           | Yes                                        | Yes                                                     | Primary Data                                      | Yes                    | Yes                     | Yes             |
| Kawakatsu et. al., 2023        | Yes          | Yes                  | Yes                           | N/A                                        | Yes                                                     | Secondary Data                                    | Yes                    | Yes                     | Yes             |
| Adelekan et. al., 2021         | Yes          | Yes                  | Yes                           | Yes                                        | Yes                                                     | Primary Data                                      | Yes                    | Yes                     | Yes             |
| de Oliveira et. al., 2022      | Yes          | Yes                  | Yes                           | N/A                                        | Yes                                                     | Secondary Data                                    | No                     | Yes                     | Yes             |
| Shet et. al., 2022             | Yes          | Yes                  | Yes                           | N/A                                        | Yes                                                     | Secondary Data                                    | Yes                    | No                      | Yes             |
| Muhoza et. al., 2021           | No           | Yes                  | N/A                           | N/A                                        | N/A                                                     | Secondary Data                                    | No                     | N/A                     | Yes             |
| Colomé-Hidalgo et. al., 2022   | Yes          | Yes                  | Yes                           | N/A                                        | Yes                                                     | Secondary Data                                    | No                     | Yes                     | Yes             |
| Santos et. al., 2021           | Yes          | Yes                  | Yes                           | N/A                                        | Yes                                                     | Secondary Data                                    | Yes                    | Yes                     | Yes             |
| Doubova et. al., 2021          | Yes          | Yes                  | Yes                           | N/A                                        | Yes                                                     | Secondary Data                                    | Yes                    | Yes                     | Yes             |
| Burt et. al., 2021             | Yes          | Yes                  | Yes                           | N/A                                        | Yes                                                     | Secondary Data                                    | Yes                    | Yes                     | Yes             |
| Hategeka et. al., 2021         | Yes          | Yes                  | Yes                           | N/A                                        | Yes                                                     | Secondary Data                                    | Yes                    | Yes                     | Yes             |
| Causey et. al., 2021           | Yes          | Yes                  | Yes                           | N/A                                        | Yes                                                     | Secondary Data                                    | No                     | Yes                     | Yes             |
| Alves et. al., 2021            | Yes          | Yes                  | Yes                           | N/A                                        | Yes                                                     | Secondary Data                                    | Yes                    | Yes                     | Yes             |
| Abu-Rish et. al., 2022         | Yes          | Yes                  | Yes                           | Yes                                        | Yes                                                     | Primary and Secondary Data                        | Yes                    | Yes                     | Yes             |
| Babalola et. al., 2022         | Yes          | Yes                  | Yes                           | Yes                                        | Yes                                                     | Primary Data                                      | Yes                    | Yes                     | Yes             |
| Evanset. al., 2022             | Yes          | Yes                  | Yes                           | N/A                                        | Yes                                                     | Secondary Data                                    | No                     | Yes                     | Yes             |
| Khatriwada et. al., 2021       | Yes          | Yes                  | Yes                           | Yes                                        | Yes                                                     | Primary Data                                      | Yes                    | Yes                     | Yes             |
| Suárez-Rodríguez et. al., 2022 | Yes          | Yes                  | Yes                           | N/A                                        | Yes                                                     | Secondary Data                                    | Yes                    | Yes                     | Yes             |
| Shaikh et. al., 2021           | Yes          | Yes                  | Yes                           | N/A                                        | Yes                                                     | Secondary Data                                    | No                     | Yes                     | Yes             |
| Rahman et. al., 2021           | Yes          | Yes                  | Yes                           | N/A                                        | Yes                                                     | Secondary Data                                    | No                     | No                      | Yes             |

| Study                                                                                          | Aims stated?              | Appropriate methods? | Appropriate methods for aims? | Appropriate recruitment strategy for aims? | Data collected in way that addressed research question? | Relationship between researcher and participants? | Ethical consideration? | Rigorous Data Analysis? | Clear findings? |
|------------------------------------------------------------------------------------------------|---------------------------|----------------------|-------------------------------|--------------------------------------------|---------------------------------------------------------|---------------------------------------------------|------------------------|-------------------------|-----------------|
| 8                                                                                              | Khan et. al., 2022        | Yes                  | Yes                           | Yes                                        | Yes                                                     | Primary Data                                      | Yes                    | No                      | Yes             |
|                                                                                                | Bimpong et. al., 2021     | Yes                  | Yes                           | Yes                                        | Yes                                                     | Primary and Secondary Data                        | Yes                    | Yes                     | Yes             |
|                                                                                                | Rana et. al., 2021        | No                   | N/A                           | No                                         | N/A                                                     | Secondary Data                                    | No                     | No                      | Yes             |
|                                                                                                | Powelson et. al., 2022    | Yes                  | Yes                           | Yes                                        | Yes                                                     | Primary Data                                      | Yes                    | Yes                     | Yes             |
|                                                                                                | Wambua et. al., 2022      | Yes                  | Yes                           | Yes                                        | N/A                                                     | Secondary Data                                    | Yes                    | Yes                     | Yes             |
|                                                                                                | Mariani et. al., 2022     | Yes                  | Yes                           | Yes                                        | N/A                                                     | Secondary Data                                    | Yes                    | No                      | Yes             |
|                                                                                                | Summan et. al., 2023      | Yes                  | Yes                           | Yes                                        | N/A                                                     | Secondary Data                                    | No                     | Yes                     | Yes             |
|                                                                                                | Thsehla et. al., 2023     | Yes                  | Yes                           | Yes                                        | N/A                                                     | Secondary Data                                    | Yes                    | Yes                     | Yes             |
|                                                                                                | Adilo et. al., 2022       | Yes                  | Yes                           | Yes                                        | Yes                                                     | Primary and Secondary Data                        | Yes                    | Yes                     | Yes             |
|                                                                                                | Lucinde et. al., 2023     | Yes                  | Yes                           | Yes                                        | Yes                                                     | Primary Data                                      | Yes                    | Yes                     | Yes             |
|                                                                                                | Connolly et. al., 2022    | Yes                  | Yes                           | Yes                                        | N/A                                                     | Secondary Data                                    | Yes                    | Yes                     | Yes             |
|                                                                                                | Burkholder et. al., 2021  | Yes                  | Yes                           | Yes                                        | N/A                                                     | Secondary Data                                    | No                     | Yes                     | Yes             |
|                                                                                                | Mbaeyi et. al., 2021      | No                   | Yes                           | N/A                                        | N/A                                                     | Secondary Data                                    | No                     | Yes                     | Yes             |
|                                                                                                | Kiarie et. al., 2022      | Yes                  | Yes                           | Yes                                        | N/A                                                     | Secondary Data                                    | Yes                    | Yes                     | Yes             |
|                                                                                                | Doubova et. al., 2022     | Yes                  | Yes                           | Yes                                        | N/A                                                     | Secondary Data                                    | Yes                    | Yes                     | Yes             |
|                                                                                                | Ho et. al., 2022          | Yes                  | Yes                           | Yes                                        | N/A                                                     | Secondary Data                                    | Yes                    | No                      | Yes             |
|                                                                                                | Melkonyan et. al., 2022   | Yes                  | Yes                           | Yes                                        | N/A                                                     | Secondary Data                                    | Yes                    | No                      | Yes             |
|                                                                                                | Kissi et. al., 2022       | Yes                  | Yes                           | Yes                                        | Yes                                                     | Primary Data                                      | Yes                    | No                      | No              |
|                                                                                                | Minta et. al., 2022       | No                   | Yes                           | No                                         | N/A                                                     | Secondary Data                                    | No                     | Yes                     | Yes             |
|                                                                                                | Plotkin et. al., 2022     | Yes                  | Yes                           | Yes                                        | N/A                                                     | Secondary Data                                    | Yes                    | Yes                     | Yes             |
|                                                                                                | Cooper et. al., 2023      | Yes                  | Yes                           | Yes                                        | Yes                                                     | Primary and Secondary Data                        | Yes                    | Yes                     | Yes             |
|                                                                                                | Kasonia et. al., 2023     | Yes                  | Yes                           | Yes                                        | Yes                                                     | Primary and Secondary Data                        | Yes                    | Yes                     | Yes             |
|                                                                                                | Winter et. al., 2023      | Yes                  | Yes                           | Yes                                        | N/A                                                     | Secondary Data                                    | Yes                    | Yes                     | Yes             |
|                                                                                                | Fahriani et. al., 2021    | Yes                  | Yes                           | Yes                                        | Yes                                                     | Primary Data                                      | Yes                    | Yes                     | Yes             |
|                                                                                                | Orey et. al., 2023        | Yes                  | Yes                           | Yes                                        | N/A                                                     | Secondary Data                                    | Yes                    | No                      | No              |
|                                                                                                | Sucharitha et. al., 2022  | Yes                  | Yes                           | Yes                                        | Yes                                                     | Primary Data                                      | Yes                    | Yes                     | Yes             |
|                                                                                                | Manzoor et. al., 2022     | Yes                  | Yes                           | Yes                                        | Yes                                                     | Primary Data                                      | Yes                    | No                      | Yes             |
|                                                                                                | Tawar et. al., 2022       | Yes                  | No                            | Yes                                        | Yes                                                     | Primary and Secondary Data                        | No                     | No                      | No              |
|                                                                                                | Wu et. al., 2020          | Yes                  | Yes                           | Yes                                        | N/A                                                     | Secondary Data                                    | No                     | Yes                     | Yes             |
|                                                                                                | Owais et. al., 2023       | Yes                  | Yes                           | Yes                                        | N/A                                                     | Secondary Data                                    | No                     | No                      | No              |
|                                                                                                | Rodo et. al., 2022        | Yes                  | Yes                           | Yes                                        | Yes                                                     | Primary and Secondary Data                        | Yes                    | Yes                     | Yes             |
|                                                                                                | Chakrabarti et. al., 2023 | Yes                  | Yes                           | No                                         | N/A                                                     | Secondary Data                                    | Yes                    | No                      | Yes             |
|                                                                                                | Berhane et. al., 2023     | Yes                  | Yes                           | Yes                                        | Yes                                                     | Primary and Secondary Data                        | Yes                    | Yes                     | Yes             |
|                                                                                                | Zeidan et. al., 2023      | Yes                  | Yes                           | Yes                                        | Yes                                                     | Primary and Secondary Data                        | No                     | No                      | Yes             |
|                                                                                                | Aigbogun et. al., 2023    | Yes                  | Yes                           | Yes                                        | Yes                                                     | Primary and Secondary Data                        | Yes                    | Yes                     | No              |
|                                                                                                | Ji et. al., 2023          | Yes                  | Yes                           | Yes                                        | Yes                                                     | Primary Data                                      | Yes                    | Yes                     | Yes             |
|                                                                                                | Endehabtu et. al., 2023   | Yes                  | Yes                           | Yes                                        | Yes                                                     | Primary Data                                      | Yes                    | No                      | Yes             |
|                                                                                                | Sharma et. al., 2023      | Yes                  | No                            | Yes                                        | N/A                                                     | Secondary Data                                    | Yes                    | No                      | No              |
| Table 2: Modified Critical Appraisal Skills Program Quality Assessment for Qualitative Studies |                           |                      |                               |                                            |                                                         |                                                   |                        |                         |                 |



## Additional Supplementary Tables

| OVERVIEW                     |                     | OUTCOMES         |      |       |             |              |
|------------------------------|---------------------|------------------|------|-------|-------------|--------------|
| Study                        | Countries           | Routine coverage | SIA  | Doses | Dose timing | Supply chain |
| Hou et. al., 2021            | China               |                  |      |       | TRUE        |              |
| Bose et al., 2022            | Nepal               |                  | TRUE |       |             |              |
| Mansour et al., 2021         | Lebanon             | TRUE             |      | TRUE  |             |              |
| Wanyana et. al., 2021        | Rwanda              |                  |      |       |             |              |
| Saso et. al., 2020           | Multiple            | TRUE             |      |       |             |              |
| Carter et. al., 2022         | Ethiopia            | TRUE             |      |       |             |              |
| Shapiro et. al., 2022        | Multiple            | TRUE             |      |       |             |              |
| Desta et. al., 2021          | Ethiopia            | TRUE             |      |       |             |              |
| Jensen et. al., 2020         | South Africa        | TRUE             |      |       |             |              |
| Silveira et. al., 2021       | Brazil              | TRUE             |      |       |             |              |
| Harris et. al., 2021         | SEAR/WPR            | TRUE             |      |       |             |              |
| Chandir et. al., 2020        | Pakistan            | TRUE             |      |       | TRUE        |              |
| Shapira et. al., 2021        | Subsaharan Africa   | TRUE             |      | TRUE  | TRUE        |              |
| Abid et. al., 2022           | Afghanistan         | TRUE             |      |       |             |              |
| Khan et. al., 2021           | India               |                  |      | TRUE  |             |              |
| Zeitouny et. al., 2021       | Multiple            |                  |      | TRUE  |             | TRUE         |
| Cabral et. al., 2021         | Brazil and Portugal |                  |      |       |             |              |
| Singh et. al., 2021          | Nepal               | TRUE             |      |       |             |              |
| Patel et. al., 2022          | India               | TRUE             |      |       |             | TRUE         |
| Bekele et. al., 2022         | Ethiopia            |                  |      |       |             |              |
| Shet et. al., 2021           | India               | TRUE             |      |       |             |              |
| Nguyenet. al., 2021          | India               | TRUE             |      |       |             |              |
| Mishra et. al., 2023         | India               |                  |      |       | TRUE        |              |
| Wang et. al., 2022           | China               |                  |      |       | TRUE        |              |
| Jain et. al., 2021           | India               | TRUE             |      | TRUE  | TRUE        |              |
| Avula et. al., 2022          | India               |                  |      |       |             |              |
| Nigus et. al., 2020          | Ethiopia            |                  |      |       |             |              |
| Assefa et. al., 2021         | Multiple            | TRUE             |      | TRUE  |             |              |
| Kawakatsu et. al., 2023      | Ghana               | TRUE             |      |       |             |              |
| Adelekan et. al., 2021       | Nigeria             | TRUE             |      | TRUE  |             |              |
| de Oliveira et. al., 2022    | Brazil              |                  |      | TRUE  |             |              |
| Shet et. al., 2022           | Multiple            | TRUE             | TRUE |       |             |              |
| Muhoza et. al., 2021         | Multiple            | TRUE             |      |       |             |              |
| Colomé-Hidalgo et. al., 2022 | Dominican Republic  | TRUE             |      |       |             |              |
| Santos et. al., 2021         | Brazil              | TRUE             |      |       |             |              |
| Doubova et. al., 2021        | Mexico              | TRUE             |      |       |             |              |
| Burt et. al., 2021           | Uganda              | TRUE             | TRUE |       |             | TRUE         |
| Hategeka et. al., 2021       | DRC                 | TRUE             |      |       |             |              |
| Causey et. al., 2021         | Multiple            | TRUE             |      |       |             |              |
| Alves et. al., 2021          | Brazil              | TRUE             |      |       |             |              |
| Abu-Rish et. al., 2022       | Jordan              | TRUE             |      |       | TRUE        |              |

|                                |              |      |      |      |      |
|--------------------------------|--------------|------|------|------|------|
| Babalola et. al., 2022         | Liberia      | TRUE |      |      | TRUE |
| Evans et. al., 2022            | Multiple     | TRUE |      |      |      |
| Khawaja et. al., 2021          | Nepal        |      |      | TRUE | TRUE |
| Suárez-Rodríguez et. al., 2022 | Ecuador      | TRUE | TRUE |      |      |
| Shaikh et. al., 2021           | Multiple     | TRUE |      |      |      |
| Rahman et. al., 2021           | Pakistan     | TRUE |      |      |      |
| Khan et. al., 2022             | Pakistan     |      |      | TRUE |      |
| Bimpong et. al., 2021          | Ghana        | TRUE |      |      |      |
| Rana et. al., 2021             | Bangladesh   | TRUE |      |      |      |
| Powelson et. al., 2022         | Mozambique   | TRUE | TRUE | TRUE |      |
| Wambua et. al., 2022           | Kenya        | TRUE |      |      |      |
| Mariani et. al., 2022          | Sierra Leone |      | TRUE |      |      |
| Summan et. al., 2023           | India        | TRUE |      | TRUE |      |
| Thsehla et. al., 2023          | South Africa | TRUE | TRUE |      |      |
| Adilo et. al., 2022            | Ethiopia     |      |      |      | TRUE |
| Lucinde et. al., 2023          | Kenya        | TRUE |      |      |      |
| Connolly et. al., 2022         | Multiple     | TRUE |      |      |      |
| Burkholder et. al., 2021       | Multiple     | TRUE | TRUE |      | TRUE |
| Mbaeyi et. al., 2021           | Pakistan     |      |      |      |      |
| Kiarie et. al., 2022           | Kenya        |      | TRUE |      |      |
| Dobova et. al., 2022           | Mexico       | TRUE |      |      |      |
| Ho et. al., 2022               | Multiple     |      | TRUE |      |      |
| Melkonyan et. al., 2022        | Armenia      | TRUE |      |      |      |
| Kissi et. al., 2022            | Ghana        | TRUE |      |      |      |
| Minta et. al., 2022            | Multiple     | TRUE | TRUE |      |      |
| Plotkin et. al., 2022          | Multiple     | TRUE | TRUE |      |      |
| Cooper et. al., 2023           | Burkina Faso | TRUE |      |      |      |
| Kasonia et. al., 2023          | Multiple     |      | TRUE |      |      |
| Winter et. al., 2023           | Zambia       | TRUE |      |      |      |
| Fahriani et. al., 2021         | Indonesia    |      |      | TRUE |      |
| Orey et. al., 2023             | Somalia      | TRUE |      |      |      |
| Sucharitha et. al., 2022       | India        |      | TRUE |      |      |
| Manzoor et. al., 2022          | Pakistan     |      |      | TRUE |      |
| Tawar et. al., 2022            | India        | TRUE | TRUE |      |      |
| Wu et. al., 2020               | China        | TRUE | TRUE |      |      |
| Owais et. al., 2023            | South Asia   | TRUE |      |      |      |
| Rodo et. al., 2022             | Multiple     | TRUE |      |      |      |
| Chakrabarti et. al., 2023      | India        |      | TRUE |      |      |
| Berhane et. al., 2023          | Ethiopia     |      | TRUE |      |      |
| Zeidan et. al., 2023           | Iraq         |      |      | TRUE |      |
| Aigbogun et. al., 2023         | Nigeria      | TRUE |      |      | TRUE |
| Ji et. al., 2023               | China        | TRUE |      | TRUE |      |
| Endehabtu et. al., 2023        | Ethiopia     |      |      |      | TRUE |
| Sharma et. al., 2023           | India        |      |      |      |      |

Table 3: Overview of countries examined and outcomes reported (routine coverage, supplementary immunisation campaigns (SIAs), dose timing, or supply chain disruptions) by included papers.
